# Supplementary material
Source: Springer Nature journal article supplement (https://www.springermedizin.de/resource/supplementary/13023_2013_646_MOESM4_ESM.pdf/9642598)

# AATD

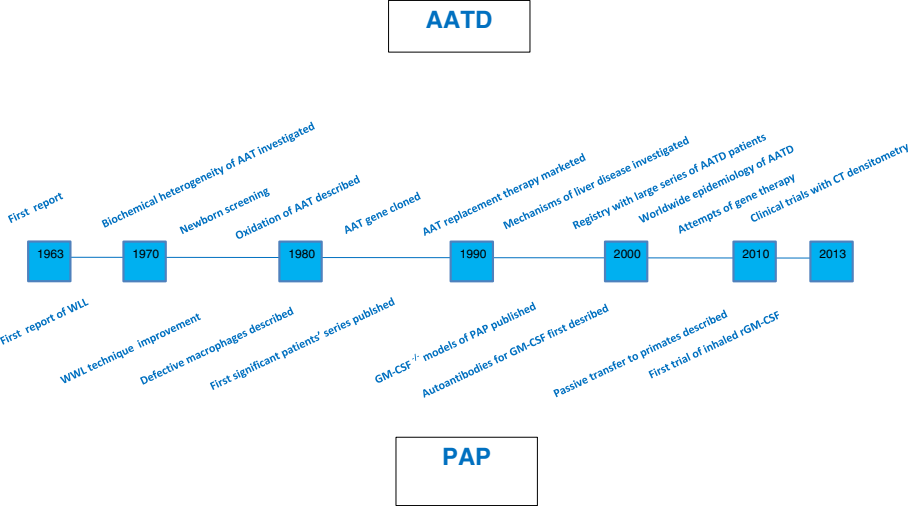

# PAP

Supplement: MOESM4 [file 9642598]
